# Supplementary material for: SARS-CoV-2 vaccine-induced antibodies protect against Omicron breakthrough infection
Source: PubMed Central journal article supplement — iScience. 2023 Aug 14;26(9):107621. doi: 10.1016/j.isci.2023.107621 (PMC10481355; doi:10.1016/j.isci.2023.107621), 2023-08-14
Supplement: mmc1.pdf [file mmc1.pdf]

## **Supplemental information**

### **SARS-CoV-2 vaccine-induced antibodies**

#### **protect against Omicron breakthrough infection**

**Eva A.M. Baerends, Astrid K. Hvidt, Joanne Reekie, Ole S. Søgaard, Nina B. Stærke, Dorthe Raben, Henrik Nielsen, Kristine T. Petersen, Maria R. Juhl, Isik S. Johansen, Susan O. Lindvig, Lone W. Madsen, Lothar Wiese, Lene S. Knudsen, Mette B. Iversen, Thomas Benfield, Kasper K. Iversen, Sidsel D. Andersen, Anna K. Juhl, Lisa L. Dietz, Signe R. Andreasen, Thea K. Fischer, Christian Erikstrup, Palle Valentiner-Branth, Jens Lundgren, Lars Østergaard, Martin Tolstrup, and on behalf of the ENFORCE Study Group**

**Table of contents for supplementary material:**

**Supplementary figures**.....

- Supplementary figure 1 – Selection criteria for study participants..... 2
- Supplementary figure 2 – Examination of cellular immunity..... 3

**Supplementary tables**.....

- Supplementary table 1 – Grouping of ACE2 data..... 4
- Supplementary table 2 – Demographics of participants included in T cell immunity analysis ..... 5
- Supplementary table 3 – Demographics of participants stratified by sex ..... 6
- Supplementary table 4 – Spike-specific IgG levels stratified by sex ..... 7

**Supplementary figure 1 – Selection criteria for study participants, related to figure 1.**

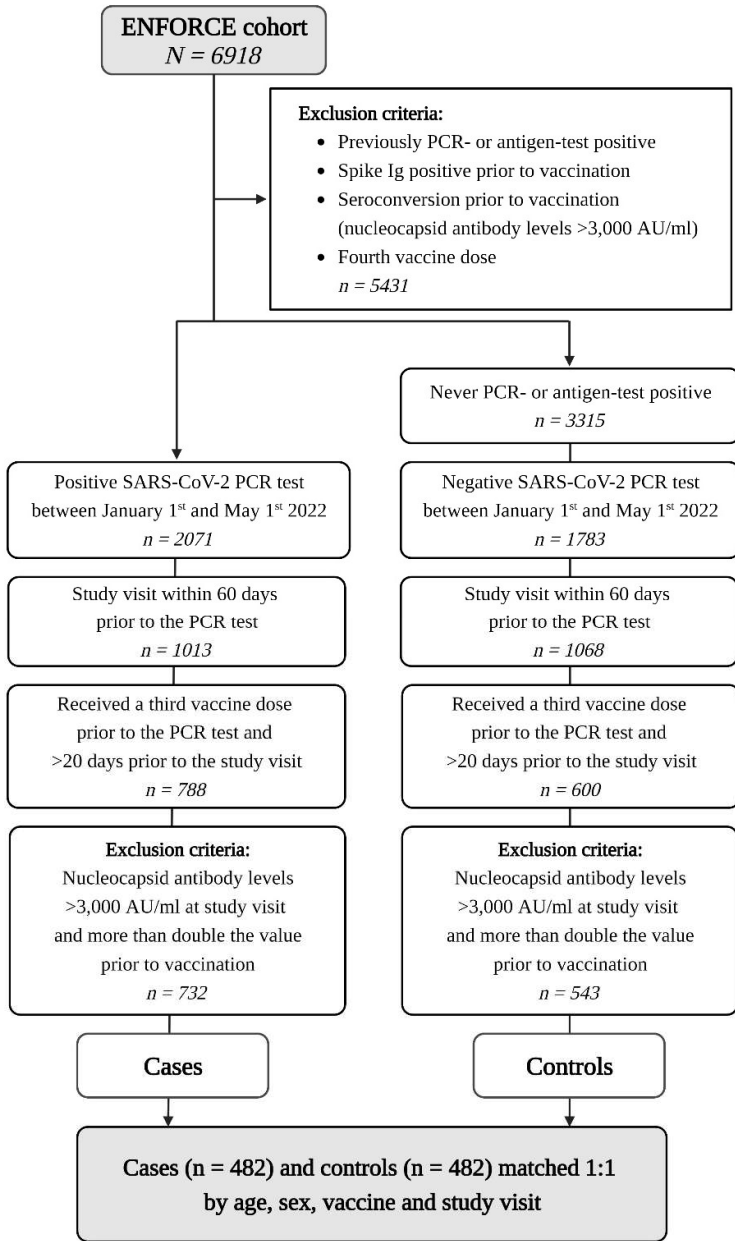

Participants for the study were selected from the ENFORCE cohort based on the presented exclusion and inclusion criteria with the number of remaining participants.

**Supplementary figure 2 – Examination of cellular immunity, related to figure 2 and 4.**

**A**

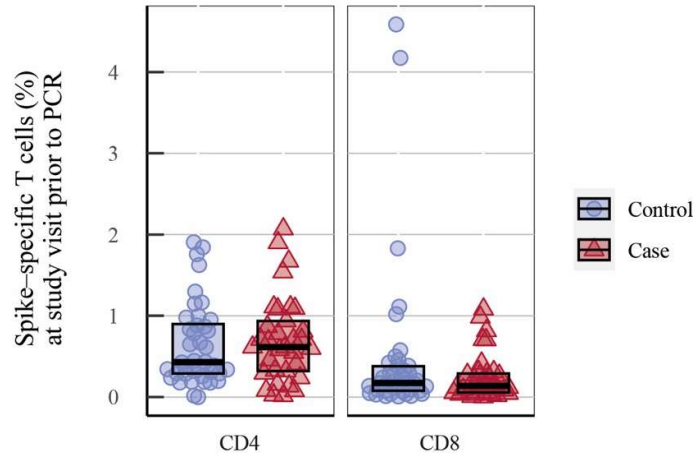

**B**

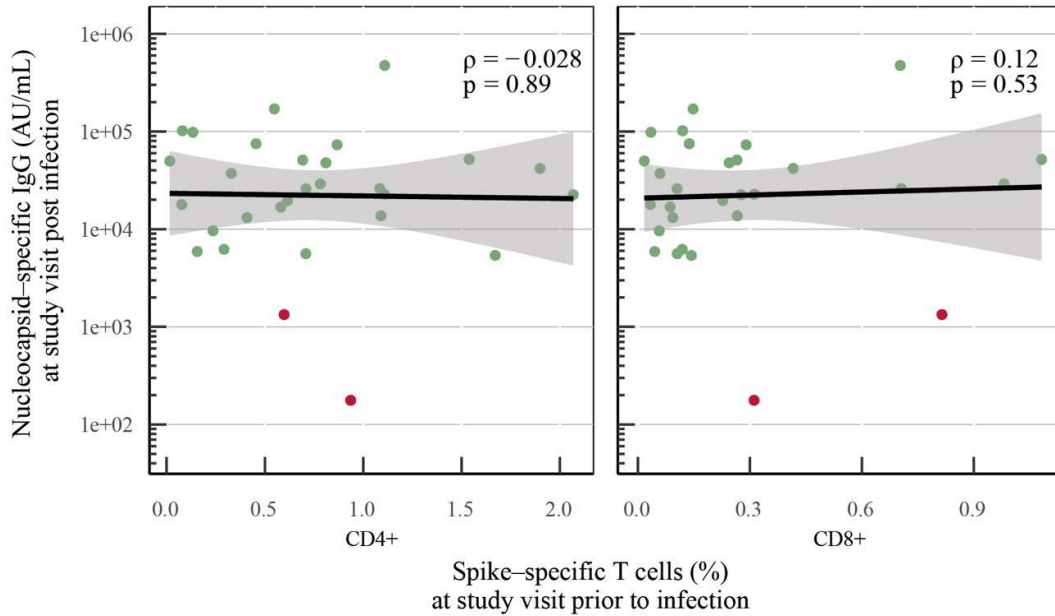

SARS-CoV-2 spike-specific CD4+ and CD8+ T cell frequencies were quantified in an unmatched subpopulation of the study cohort, who donated PBMCs (n=40, 54.8% for cases and n=33, 45.2% for controls). **A)** Boxplot showing the median percentage of spike-specific CD4+ T cells and CD8+ T cells with lower and upper quartiles. Wilcoxon rank sum test was performed to compare cellular responses in cases and controls and no statistically significant differences were found. **B)** Spearman correlations between infection-induced nucleocapsid-specific IgG (AU/mL) and vaccine-induced spike-specific CD4+ and CD8+ T cells (%) (Wuhan-Hu-1). No correlation was found.

**Supplementary table 1 – Grouping of ACE2 data, related to figure 2 and 3.**

| Variant      | Grouping | Total N | Cases | Controls | ACE2-blocking antibodies (AU/mL) | Median (AU/mL) |
|--------------|----------|---------|-------|----------|----------------------------------|----------------|
| Wildtype     | Q1       | 193     | 110   | 83       | <376.89                          | 165.88         |
|              | Q2       | 74      | 41    | 33       | 376.89 – 1,000                   | 552.97         |
|              | Q3-Q5    | 697     | 331   | 366      | >1,000                           | 10,000         |
| Omicron BA.1 | Q1       | 193     | 110   | 83       | <20.67                           | 11.08          |
|              | Q2       | 193     | 110   | 83       | 20.67 – 49.72                    | 33.00          |
|              | Q3       | 193     | 98    | 95       | 49.72 – 102.79                   | 72.81          |
|              | Q4       | 193     | 84    | 109      | 102.79 – 217.64                  | 150.25         |
|              | Q5       | 192     | 80    | 112      | >217.64                          | 469.76         |
| Omicron BA.2 | Q1       | 193     | 111   | 82       | <60.05                           | 25.98          |
|              | Q2       | 193     | 109   | 84       | 60.05 – 193.05                   | 116.83         |
|              | Q3       | 193     | 101   | 92       | 193.05 – 680.62                  | 347.58         |
|              | Q4       | 45      | 19    | 26       | 680.62 – 1,000                   | 808.48         |
|              | Q5       | 340     | 142   | 198      | >1,000                           | 10,000         |

ACE2 data were not normally distributed and were therefore split into five groups for Omicron BA.1 and BA.2. For wildtype, many samples reached the assay detection limit and were therefore split into three groups. The actual titers of ACE2-blocking antibodies in AU/mL and the median titer in AU/mL are described for each grouping.

**Supplementary table 2 – Demographics of participants included in T cell immunity analysis, related to supplementary figure 2 and figure 2 and 4.**

|                                                    | <b>Cases<br/>(n=33)</b> | <b>Control<br/>(n=40)</b> | <i>P-value</i> |
|----------------------------------------------------|-------------------------|---------------------------|----------------|
| Age at enrolment (median, IQR)                     | 59<br>(47–68)           | 65<br>(54–73)             | <i>0.164</i>   |
| Age Group (n, %)                                   |                         |                           | <i>0.655</i>   |
| <55                                                | 12 (36.4)               | 11 (27.5)                 | .              |
| 55-65                                              | 7 (21.2)                | 8 (20.0)                  | .              |
| >65                                                | 14 (42.4)               | 21 (52.5)                 | .              |
| Sex (n, %)                                         |                         |                           | <i>0.987</i>   |
| Female                                             | 18 (54.5)               | 23 (57.5)                 | .              |
| Male                                               | 15 (45.5)               | 17 (42.5)                 | .              |
| Vaccine type (n, %)                                |                         |                           | <i>0.689</i>   |
| Pfizer-BioNTech                                    | 16 (48.5)               | 19 (47.5)                 | .              |
| Moderna                                            | 9 (27.3)                | 14 (35.0)                 | .              |
| AstraZeneca/mRNA                                   | 8 (24.2)                | 7 (17.5)                  | .              |
| Study visit (n, %)                                 |                         |                           | <i>0.865</i>   |
| 28 days after 3 <sup>rd</sup> dose                 | 31 (93.9)               | 39 (97.5)                 | .              |
| Up to 170 days after 3 <sup>rd</sup> dose          | 2 (6.1)                 | 1 (2.5)                   | .              |
| Charlson Comorbidity Index (n, %)                  |                         |                           | <i>0.958</i>   |
| 0                                                  | 27 (81.8)               | 32 (80.0)                 | .              |
| 1-2                                                | 5 (15.2)                | 7 (17.5)                  | .              |
| >2                                                 | 1 (3.0)                 | 1 (2.5)                   | .              |
| Days from study visit to PCR test<br>(median, IQR) | 37<br>(26–48)           | 32<br>(16–38)             | <i>0.091</i>   |

The demographic characteristics of the unmatched subpopulation who donated PBMCs and were included in the T cell immunity analysis. The categorical variables are described as number of participants (n) and the percentage (%), while the continuous variables are described as the median and the interquartile range (IQR).

**Supplementary table 3 – Demographics of participants stratified by sex, related to figure 3.**

|                                                    | <b>Males</b><br>(n=394) | <b>Females</b><br>(n=570) | <i>P-value</i> |
|----------------------------------------------------|-------------------------|---------------------------|----------------|
| Age at enrolment (median, IQR)                     | 68<br>(59–75)           | 63<br>(55–69)             | <.0001         |
| Age Group (n, %) *                                 |                         |                           | <.0001         |
| <55                                                | 66 (16.8)               | 134 (23.5)                | .              |
| 55-65                                              | 106 (26.9)              | 198 (34.7)                | .              |
| >65                                                | 222 (56.3)              | 238 (41.8)                | .              |
| Vaccine type (n, %) *                              |                         |                           | <.0001         |
| Pfizer-BioNTech                                    | 228 (57.9)              | 252 (44.2)                | .              |
| Moderna                                            | 160 (40.6)              | 254 (44.6)                | .              |
| AstraZeneca/mRNA                                   | 6 (1.5)                 | 64 (11.2)                 | .              |
| Study visit (n, %) *                               |                         |                           | 0.0006         |
| 28 days after 3 <sup>rd</sup> dose                 | 376 (95.4)              | 564 (98.9)                | .              |
| Up to 170 days after 3 <sup>rd</sup> dose          | 18 (4.6)                | 6 (1.1)                   | .              |
| Charlson Comorbidity Index (n, %)                  |                         |                           | 0.0116         |
| 0                                                  | 290 (73.6)              | 455 (79.8)                | .              |
| 1-2                                                | 87 (22.1)               | 106 (18.6)                | .              |
| >2                                                 | 17 (4.3)                | 9 (1.6)                   | .              |
| Days from study visit to PCR test<br>(median, IQR) | 35<br>(22–48)           | 32<br>(20–46)             | 0.1434         |

\*matched variable

The demographic characteristics of participants (N=964) stratified by sex. The categorical variables are described as number of participants (n) and the percentage (%), while the continuous variables are described as the median and the interquartile range (IQR). The matched variables are indicated with an asterisk (\*).

**Supplementary table 4 – Spike-specific IgG levels stratified by sex, related to figure 3.**

| Variant        | n   | Geometric Mean                      |                                     |                           |                | Adjusted Odds Ratio      |                |
|----------------|-----|-------------------------------------|-------------------------------------|---------------------------|----------------|--------------------------|----------------|
|                |     | Cases<br><i>95% CI</i>              | Controls<br><i>95% CI</i>           | GM ratio<br><i>95% CI</i> | <i>P-value</i> | aOR<br><i>95% CI</i>     | <i>P-value</i> |
| <b>Females</b> |     |                                     |                                     |                           |                |                          |                |
| Wildtype       | 285 | 1,743,039<br><i>1530923–1984546</i> | 2,303,629<br><i>2061448–2574262</i> | 0.75<br><i>0.65–0.89</i>  | <i>0.0006</i>  | 0.49<br><i>0.31–0.77</i> | <i>0.002</i>   |
| Omicron BA.1   | 285 | 510,015<br><i>445785–583500</i>     | 689,830<br><i>609829–780327</i>     | 0.73<br><i>0.62–0.88</i>  | <i>0.0005</i>  | 0.52<br><i>0.34–0.79</i> | <i>0.002</i>   |
| Omicron BA.2   | 285 | 477,124<br><i>417909–544729</i>     | 646,169<br><i>570431–731963</i>     | 0.73<br><i>0.62–0.87</i>  | <i>0.0006</i>  | 0.53<br><i>0.35–0.79</i> | <i>0.002</i>   |
| <b>Males</b>   |     |                                     |                                     |                           |                |                          |                |
| Wildtype       | 196 | 1,747,660<br><i>1518722–2011108</i> | 1,782,834<br><i>1538972–2065337</i> | 0.98<br><i>0.81–1.18</i>  | <i>0.831</i>   | 0.84<br><i>0.49–1.45</i> | <i>0.529</i>   |
| Omicron BA.1   | 197 | 504,552<br><i>434621–585735</i>     | 493,824<br><i>412353–591391</i>     | 1.02<br><i>0.83–1.26</i>  | <i>0.838</i>   | 1.00<br><i>0.63–1.58</i> | <i>0.990</i>   |
| Omicron BA.2   | 196 | 446,818<br><i>386455–516611</i>     | 451,155<br><i>380356–535131</i>     | 0.99<br><i>0.81–1.21</i>  | <i>0.925</i>   | 0.88<br><i>0.55–1.43</i> | <i>0.618</i>   |

Quantification of spike-specific IgG levels stratified by sex prior to a positive (case) or negative PCR test (control) showing the geometric mean (GM) with 95% CI and GM ratio cases-to-controls. Multivariable logistic regression showing the adjusted odds ratios (aORs) and 95% CI for breakthrough infection for a log10-fold increase of spike-specific IgG levels. The analysis adjusts for the matched variables: age group, sex, vaccine, and study visit, and for the unmatched variables: vaccine priority group, Charlson comorbidity index (CCI), visit year, days from study visit to PCR test, and days from third vaccination to PCR test.
